# Supplementary material for: Nutrient transport and transformation in macrotidal estuaries of the French Atlantic coast: a modelling approach using C-GEM
Source: Copernicus journal article supplement (doi:10.5194/bg-2021-164), 2021-06-28
Supplement: Supplementary file 1 [file bg-2021-164-supplement-version2.pdf]

# **Nutrient transport and transformation in macrotidal estuaries of the French Atlantic coast: a modelling approach using C-GEM**

Xi Wei<sup>1\*</sup>, Josette Garnier<sup>1\*</sup>, Vincent Thieu<sup>1</sup>, Paul Passy<sup>2</sup>, Romain Le Gendre<sup>3</sup>, Gilles Billen<sup>1</sup>, Maia Akopian<sup>4</sup>, and Goulven Gildas Laruelle<sup>5</sup>

1 UMR Metis 7619, Sorbonne Université, CNRS EPHE, 4 Place Jussieu, Paris, 75005, France

2 UMR 8586 PRODIG, Université de Paris, 8 rue Albert Einstein, 75013 Paris, France

3 Ecosystèmes et Aquaculture Durable, Unité de Recherche Lagons, IFREMER, Nouméa, 98897, New-Caledonia

4 Department of Research and Scientific Support, French Biodiversity Agency (OFB), 5 square Félix Nadar, 94300 Vincennes, France

5 Department of Geosciences, Environment and Society, Université Libre de Bruxelles, Brussels, 1050, Belgium

*Correspondence to:* Xi Wei (xi.wei@upmc.fr; xi.wei\_fr@hotmail.com); Josette Garnier ([josette.garnier@upmc.fr](mailto:josette.garnier@upmc.fr)).

Due to the limited space in the main context, the results of small estuaries (the Somme and Vilaine) are presented in the supplement.

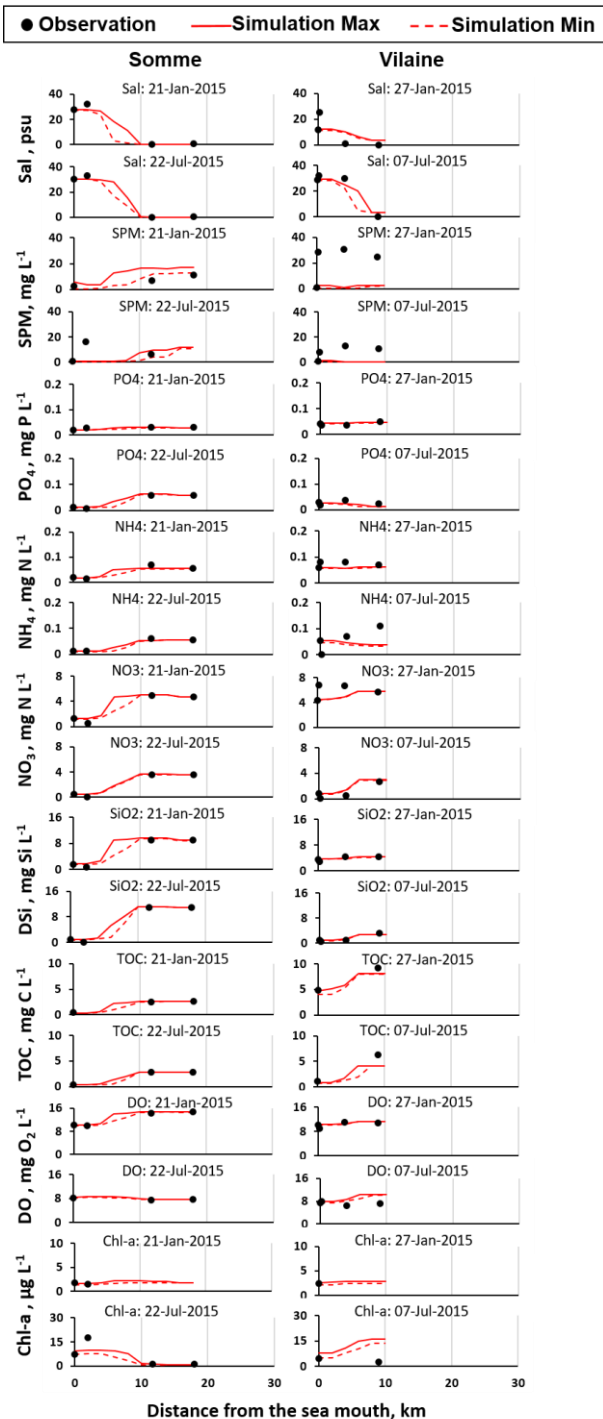

Figure S-1 Salinity (Sal), suspended particulate matter (SPM) and nutrients (PO<sub>4</sub>, NH<sub>4</sub>, NO<sub>3</sub>, DSi, TOC), dissolved oxygen (DO), chlorophyll a (Chl-a) concentrations variations along the estuaries (the Somme and Vilaine) for two selected dates (one in winter and the other one in summer). Note the different scales for the Chl-a for the estuaries.

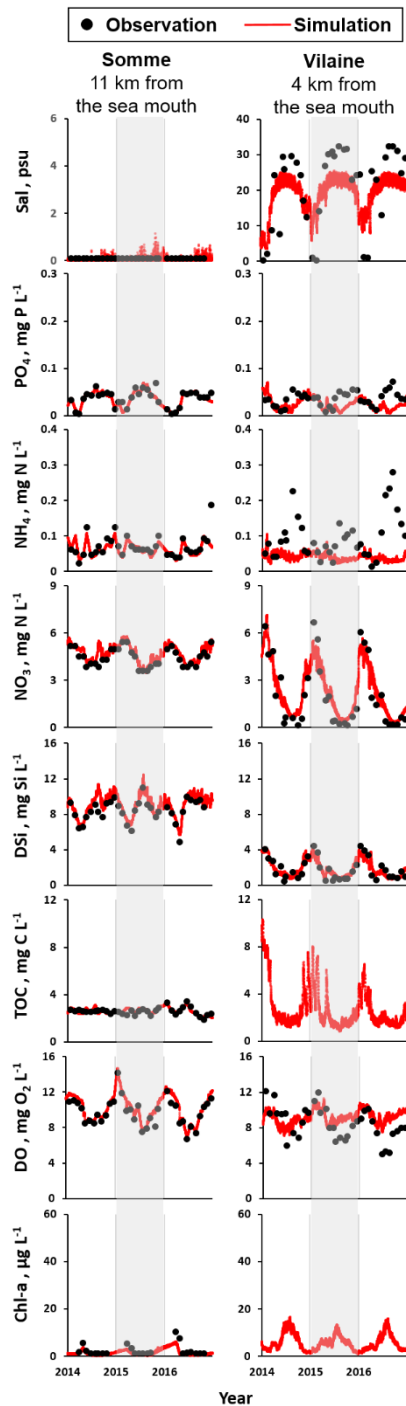

Figure S-2 Temporal variations for salinity (Sal), phosphate (PO<sub>4</sub>), ammonium (NH<sub>4</sub>), nitrate (NO<sub>3</sub>), dissolved silica (DSi), total organic carbon (TOC), dissolved oxygen (DO), and chlorophyll a (Chl-a) concentrations from 2014 to 2016 for the Somme and Vilaine estuaries at the sampling stations located about 1/2 the length of the estuary to the sea mouth. Gray columns covered the year of calibration (2015).

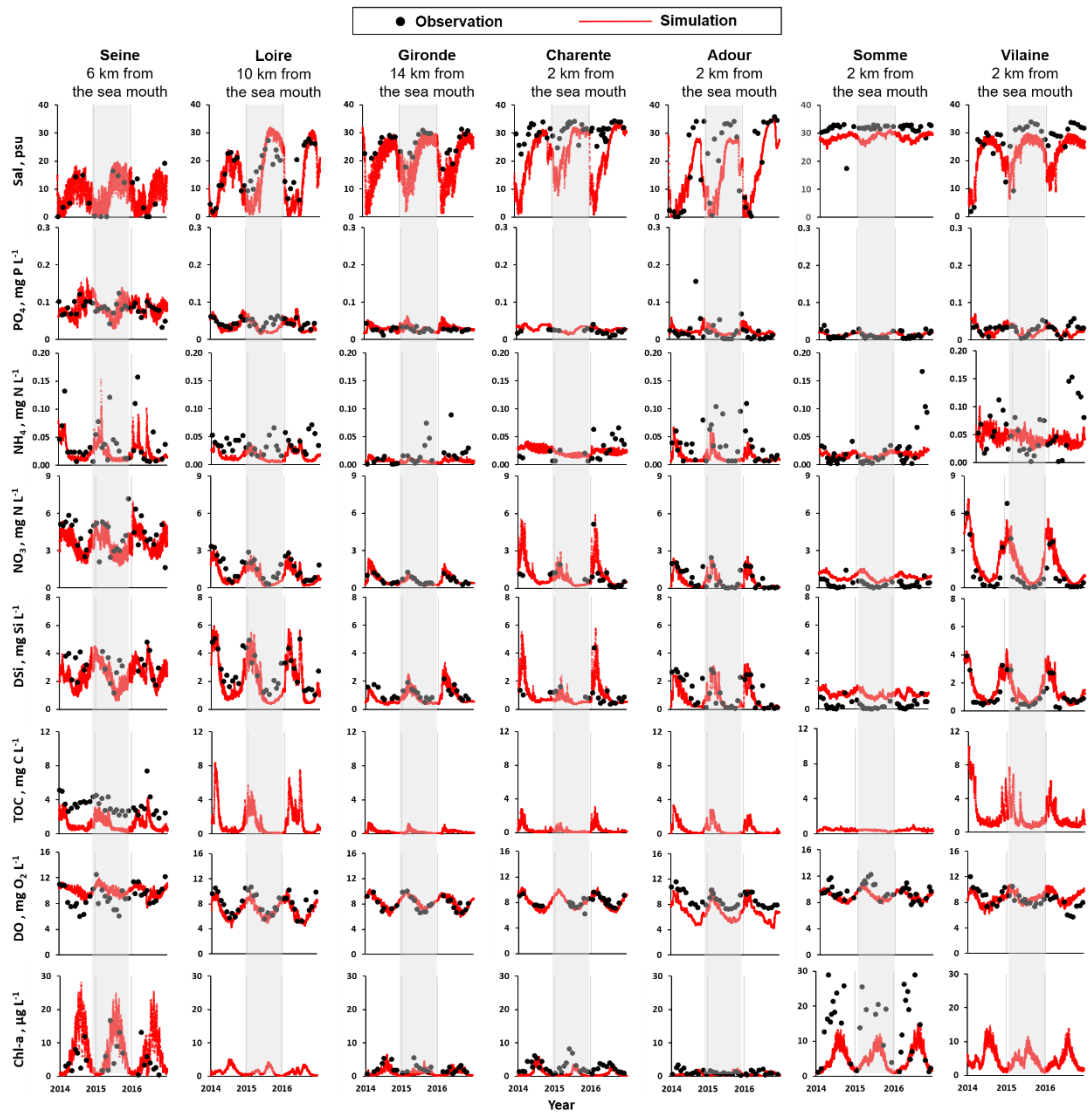

**Figure S-3** Temporal variations for salinity (Sal), phosphate (PO<sub>4</sub>), ammonium (NH<sub>4</sub>), nitrate (NO<sub>3</sub>), dissolved silica (DSi), total organic carbon (TOC), dissolved oxygen (DO), and chlorophyll a (Chl-a) concentrations from 2014 to 2016 at the sampling stations located closest to the sea mouth. Gray columns covered the year of calibration (2015).

**Table S-1 Biological formulations and stoichiometric equations used in the C-GEM biogeochemical reaction network. Tabs and T denote the absolute and the Celsius temperature, respectively, H is the water depth, S is the Salinity of the water and U and U<sub>wind</sub> are the current velocity and the wind speed at 10 meters above the surface, respectively. (a) Vanderborght et al., 2007; (b) this study ; (c) Arndt et al., 2009; (d) Gamier et al., 1995. \*If PHY=diatoms, nlim needs to account for the silica limitation for the phytoplankton growth**

Gross Primary Production <sup>(a)</sup>

$$GPP = P_{max}^B \cdot nlim \cdot PHY \cdot \int_H^0 1 - \exp\left(-\frac{\alpha}{P_{max}^B} \cdot I(0) \cdot \exp(-K_D \cdot H)\right) dz$$

Net Primary Production <sup>(a)</sup>

$$NPP = \frac{GPP}{H} \cdot (1 - k_{excr}) \cdot (1 - k_{growth}) - k_{maint} \cdot PHY$$

Phytoplankton mortality <sup>(a)</sup>

$$phy\_death = k_{mort}(T) \cdot PHY$$

Phytoplankton burial <sup>(b)</sup>

$$phy\_burial = vPHY/H \cdot PHY$$

Aerobic degradation <sup>(a)</sup>

$$Aer\_deg = k_{ox} \cdot f_{het}(T_{abs}) \cdot \frac{TOC}{TOC + K_{TOC}} \cdot \frac{O_2}{O_2 + K_{O_2}}$$

Organic Mater burial <sup>(b)</sup>

$$TOC\_burial = vTOC/H \cdot POC$$

Denitrification <sup>(a)</sup>

$$Denit = k_{denit} \cdot f_{het}(T_{abs}) \cdot \frac{TOC}{TOC + K_{TOC}} \cdot \frac{NO_3}{NO_3 + K_{NO_3}} \cdot \frac{K_{in,O_2}}{O_2 + K_{in,O_2}}$$

Nitrification <sup>(a)</sup>

$$Nit = k_{nit} \cdot f_{nit}(T_{abs}) \cdot \frac{NH_4}{NH_4 + K_{NH_4}} \cdot \frac{O_2}{O_2 + K_{O_2}}$$

Oxygen air exchange <sup>(a)</sup>

$$O_{2,ex} = \frac{vP}{H} \cdot (O_{2,sat} - O_2)$$

Maximum photosynthesis rate <sup>(c)</sup>

$$P_{max}^B = \frac{1}{\theta} \cdot \exp(0.33 + 0.102 \cdot T)$$

Nutrients limitation for phytoplankton growth <sup>(d), \*</sup>

$$nlim = \frac{NO_3 + NH_4}{NO_3 + NH_4 + K_N} \cdot \frac{PO_4}{PO_4 + K_{PO_4}}$$

Light extinction coefficient <sup>(a)</sup>

$$K_D = K_{D1} + K_{D2} \cdot SPM$$

Piston velocity <sup>(a)</sup>

$$vp = k_{flow} + k_{wind}$$

Temperature dependences for biogeochemical processes <sup>(c)</sup>

$$f_{het}(T_{abs}) = 2.75 \left( \frac{T_{abs} - 278}{10} \right) ; \quad f_{nit}(T_{abs}) = 5 \left( \frac{T_{abs} - 278}{10} \right)$$

Current component for  $vp$  <sup>(a)</sup>

$$k_{flow} = \sqrt{\frac{U \cdot D_{O_2}(T_{abs})}{H}}$$

Wind component for  $vp$  <sup>(a)</sup>

$$k_{wind} = \frac{1}{3.6 \cdot 10^5} \cdot 0.31 \cdot U_{wind,10m}^2 \cdot \sqrt{\frac{Sc(T, S)}{660}}$$

Switch between  $NH_4$  and  $NO_3$  utilization <sup>(a)</sup>

$$f_{NH_4} = \frac{NH_4}{10 + NH_4}$$

$$dPHY/dt = NPP - phy\_death - phy\_burial$$

$$dSi/dt = -redsi \cdot NPP$$

$$dTOC/dt = -Aer\_deg - Denit + phy\_death - TOC\_burial$$

$$dNO_3/dt = -94.4/106 \cdot Denit - redn \cdot (1 - f_{NH_4}) \cdot NPP + Nitr$$

$$dNH_4/dt = redn \cdot (R - f_{NH_4} \cdot NPP) - Nitr$$

$$dO_2/dt = -Aer\_deg + f_{NH_4} \cdot NPP + 138/106 \cdot (1 - f_{NH_4}) \cdot NPP - 2 \cdot Nitr + O_{2,ex}$$

$$dPO_4/dt = redp \cdot (Aer\_deg + Denit - NPP)$$

By using the outputs (reaction process rates,  $\mu\text{mol L}^{-1} \text{d}^{-1}$ ) from the model, we were able to calculate the related process fluxes (ton C, Si or N  $\text{d}^{-1}$ ) at each grid over three years. Then integrating the mean annual process fluxes along the estuary allowed us to evaluate the process fluxes in the each of the estuary systems which are the values presented in Table S-2.

**Table S-2 Mean daily process fluxes (2014-2016) of the estuaries studied, and percentages (%) of the reaction process with respect to the total import fluxes from upstream.**

| Estuary  | Variable                                 | Reaction Process           | Process Flux | % of Import Flux |
|----------|------------------------------------------|----------------------------|--------------|------------------|
| Seine    | TOC (ton C $\text{d}^{-1}$ )             | Organic Matter Degradation | -60.7        | -39%             |
|          | Si (ton Si $\text{d}^{-1}$ )             | Net Primary Production     | -19.2        | -13%             |
|          | NO <sub>3</sub> (ton N $\text{d}^{-1}$ ) | Denitrification            | -15.0        | -6%              |
| Loire    | TOC (ton C $\text{d}^{-1}$ )             | Organic Matter Degradation | -153.7       | -36%             |
|          | Si (ton Si $\text{d}^{-1}$ )             | Net Primary Production     | -11.3        | -3%              |
|          | NO <sub>3</sub> (ton N $\text{d}^{-1}$ ) | Denitrification            | -39.9        | -14%             |
| Gironde  | TOC (ton C $\text{d}^{-1}$ )             | Organic Matter Degradation | -203.1       | -98%             |
|          | Si (ton Si $\text{d}^{-1}$ )             | Net Primary Production     | -39.8        | -16%             |
|          | NO <sub>3</sub> (ton N $\text{d}^{-1}$ ) | Denitrification            | -43.2        | -26%             |
| Charente | TOC (ton C $\text{d}^{-1}$ )             | Organic Matter Degradation | -4.4         | -24%             |
|          | Si (ton Si $\text{d}^{-1}$ )             | Net Primary Production     | -0.7         | -2%              |
|          | NO <sub>3</sub> (ton N $\text{d}^{-1}$ ) | Denitrification            | -1.0         | -3%              |
| Adour    | TOC (ton C $\text{d}^{-1}$ )             | Organic Matter Degradation | -20.1        | -33%             |
|          | Si (ton Si $\text{d}^{-1}$ )             | Net Primary Production     | -0.4         | -1%              |
|          | NO <sub>3</sub> (ton N $\text{d}^{-1}$ ) | Denitrification            | -4.6         | -8%              |
| Somme    | TOC (ton C $\text{d}^{-1}$ )             | Organic Matter Degradation | -2.2         | -29%             |
|          | Si (ton Si $\text{d}^{-1}$ )             | Net Primary Production     | -3.2         | -12%             |
|          | NO <sub>3</sub> (ton N $\text{d}^{-1}$ ) | Denitrification            | -0.5         | -3%              |
| Vilaine  | TOC (ton C $\text{d}^{-1}$ )             | Organic Matter Degradation | -9           | -10%             |
|          | Si (ton Si $\text{d}^{-1}$ )             | Net Primary Production     | -3.4         | -8%              |
|          | NO <sub>3</sub> (ton N $\text{d}^{-1}$ ) | Denitrification            | -2.0         | -3%              |

#### Reference:

Arndt, S., Regnier, P. and Vanderborgh, J. P.: Seasonally-resolved nutrient export fluxes and filtering capacities in a macrotidal estuary, *J. Mar. Syst.*, 78(1), 42–58, doi:10.1016/j.jmarsys.2009.02.008, 2009.

Gamier, J., Billen, G. and Coste, M.: Seasonal succession of diatoms and Chlorophyceae in the drainage network of the Seine River: Observation and modeling, *Limnol. Oceanogr.*, 40(4), 750–765, doi:10.4319/lo.1995.40.4.0750, 1995.

Vanderborgh, J. P., Folmer, I. M., Aguilera, D. R., Uhrenholdt, T. and Regnier, P.: Reactive-transport modelling of C, N, and O<sub>2</sub> in a river-estuarine-coastal zone system: Application to the Scheldt estuary, *Mar. Chem.*, 106(1-2 SPEC. ISS.), 92–110, doi:10.1016/j.marchem.2006.06.006, 2007.
